# Supplementary material for: Genetic contribution to multiple sclerosis risk among Ashkenazi Jews
Source: PubMed Central journal article supplement (PMC4557862; doi:10.1186/s12881-015-0201-2), 2015-07-28

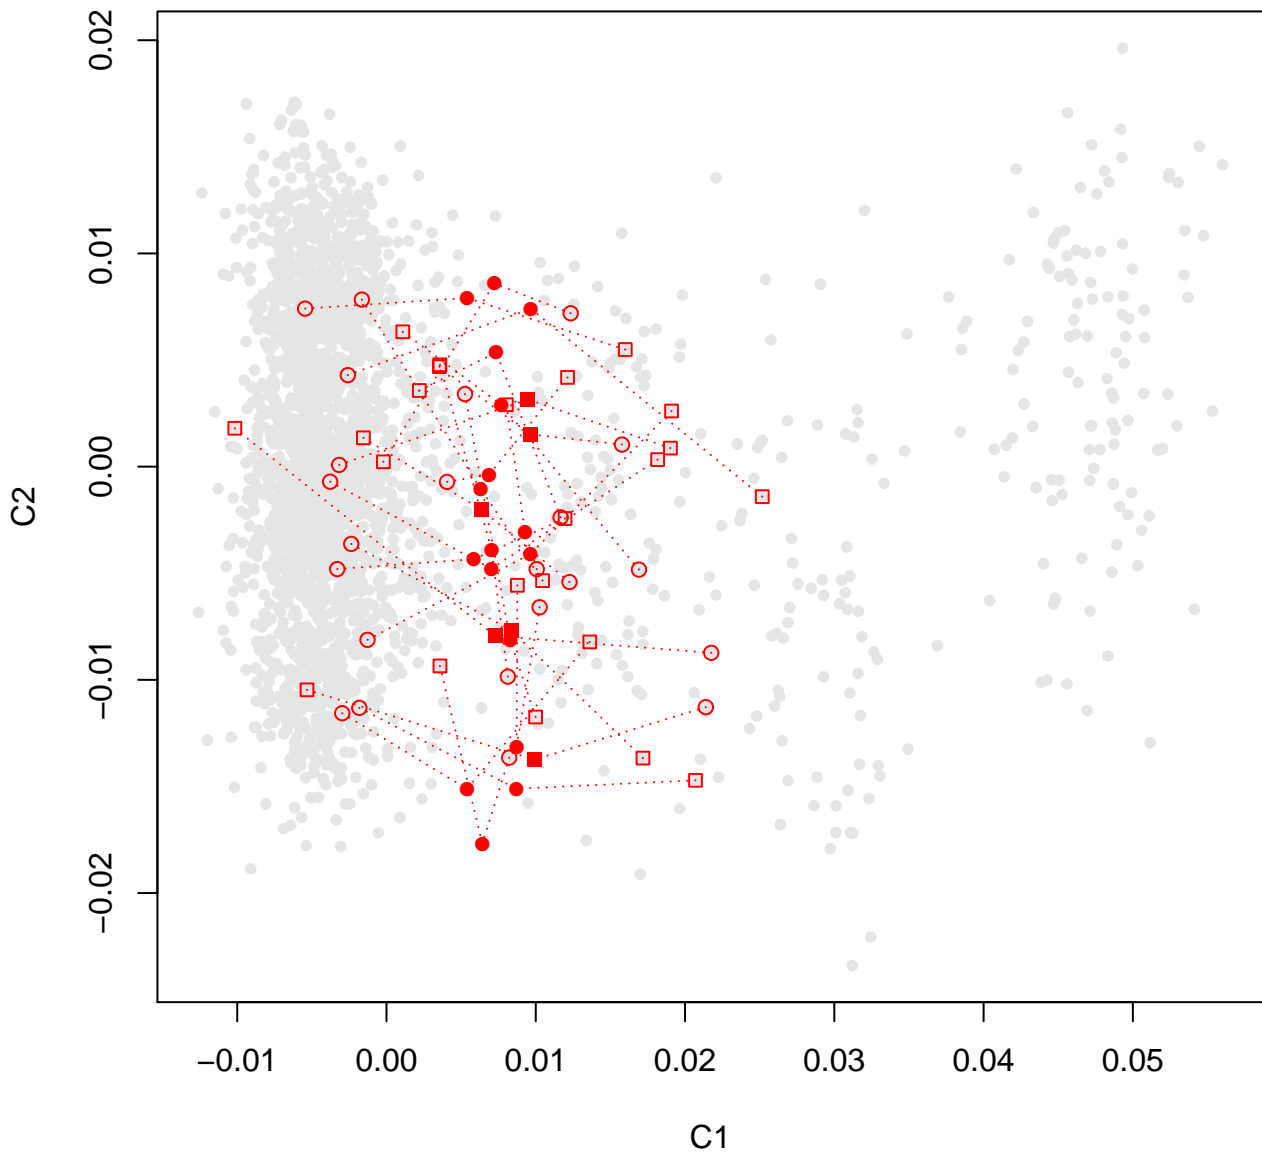

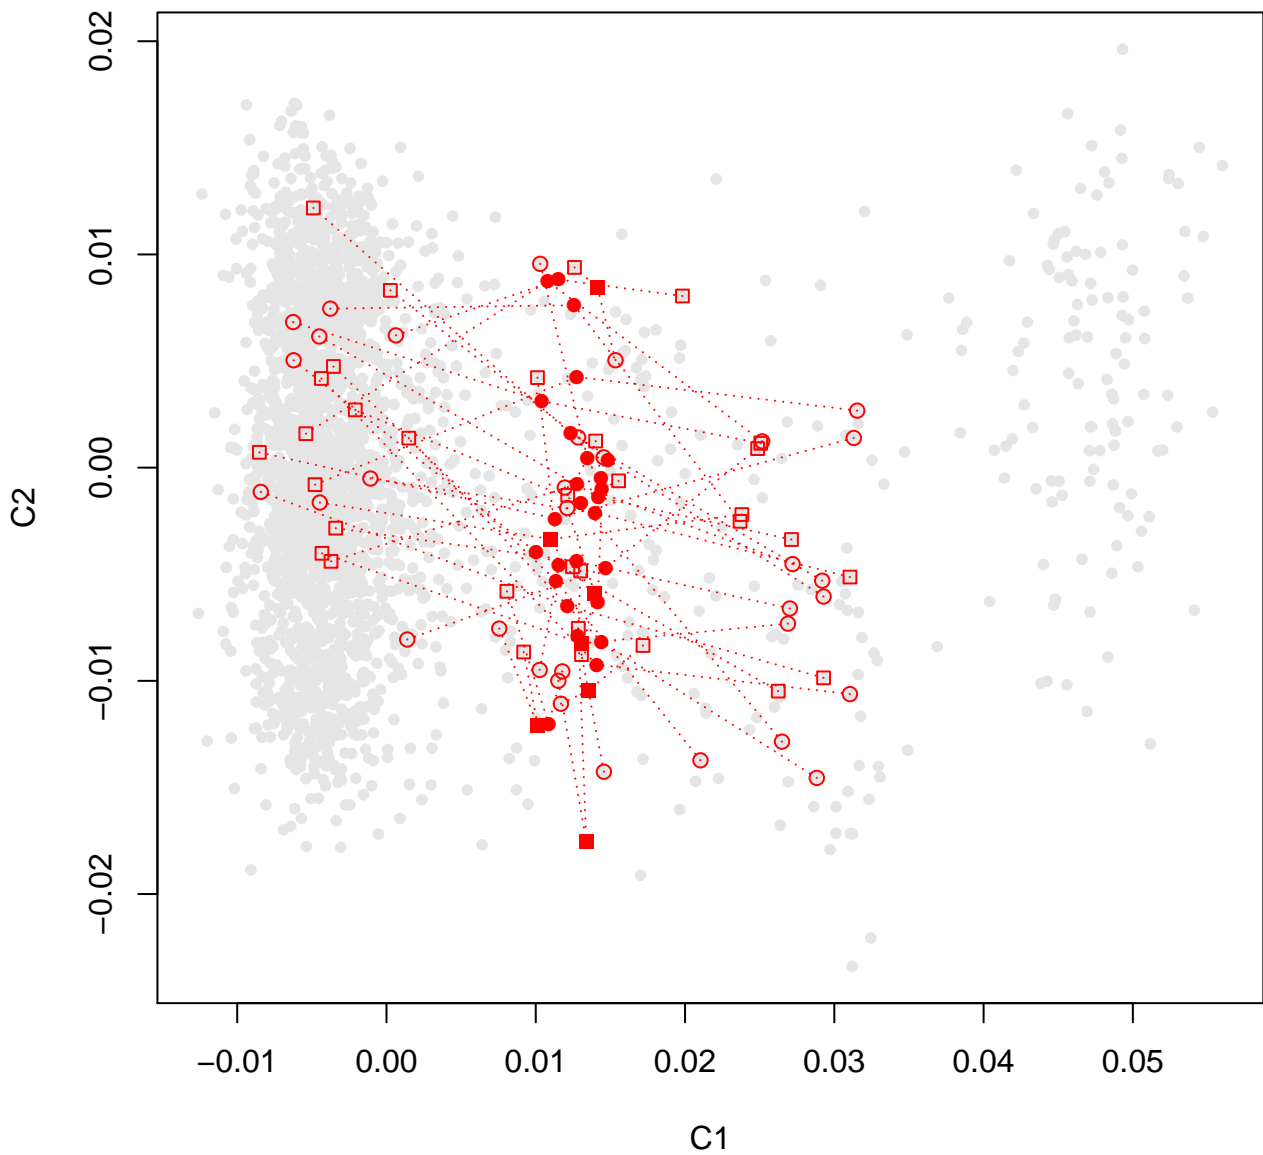

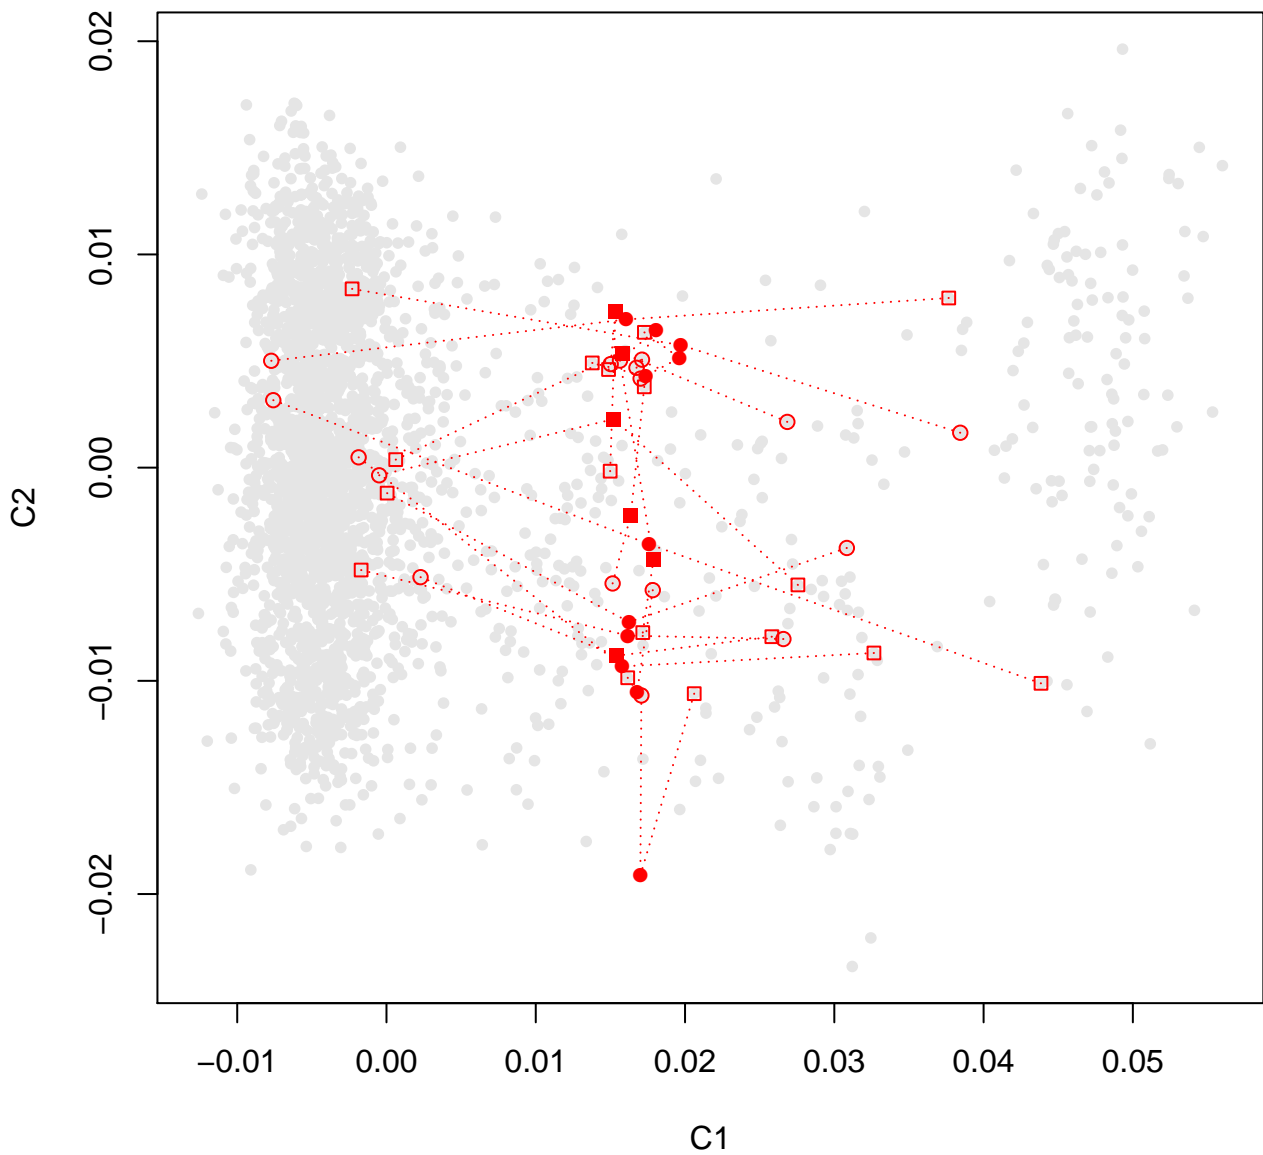

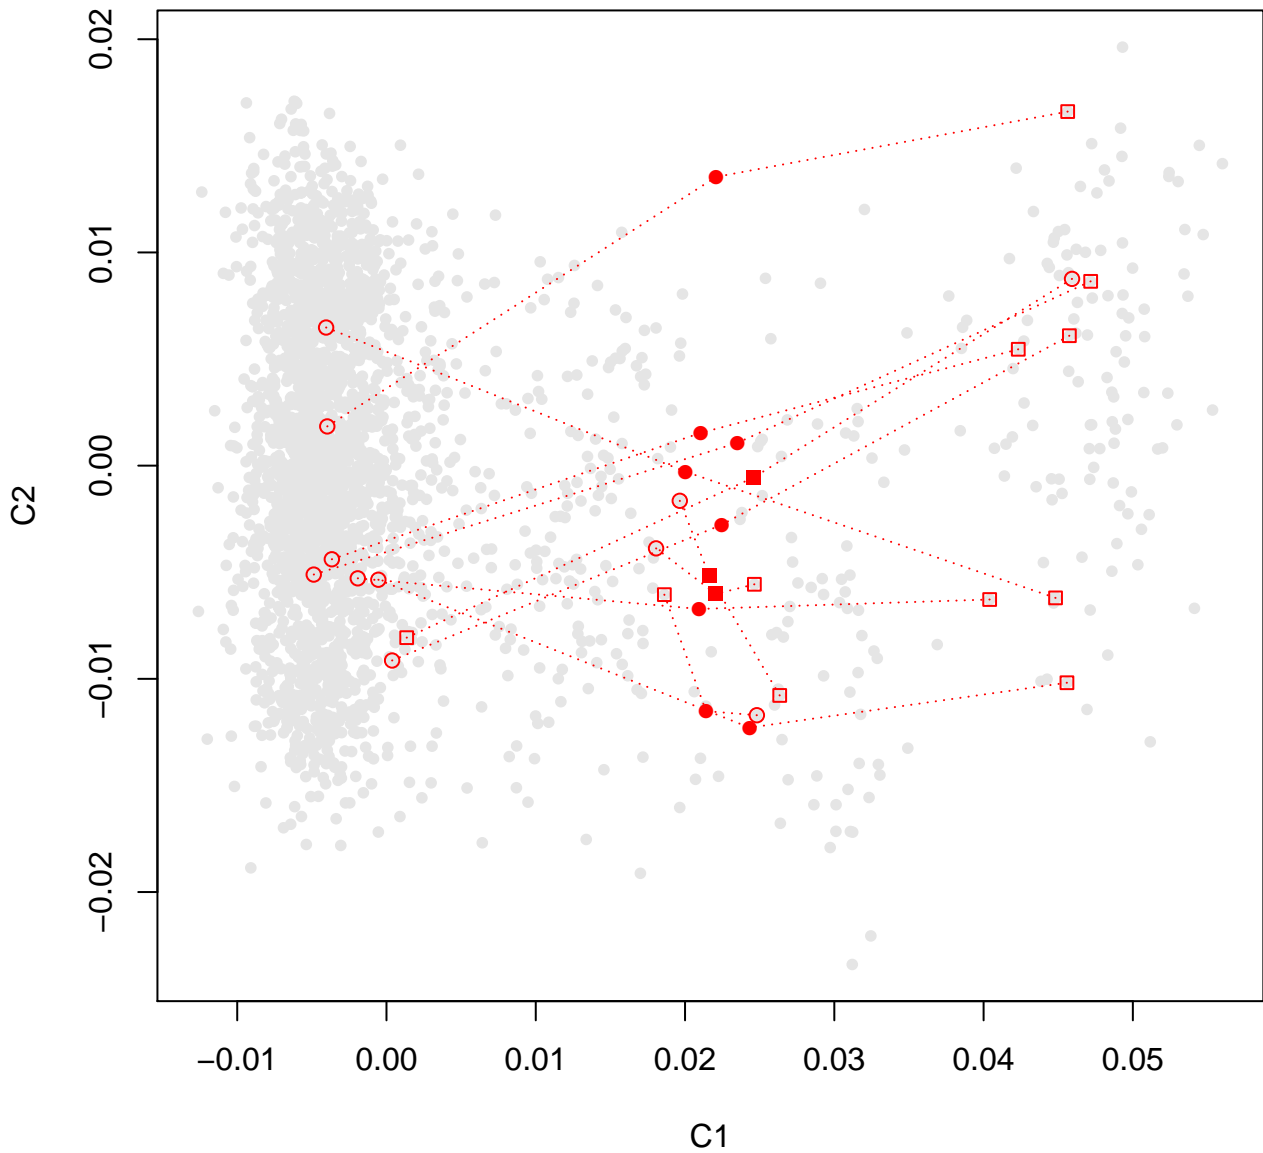

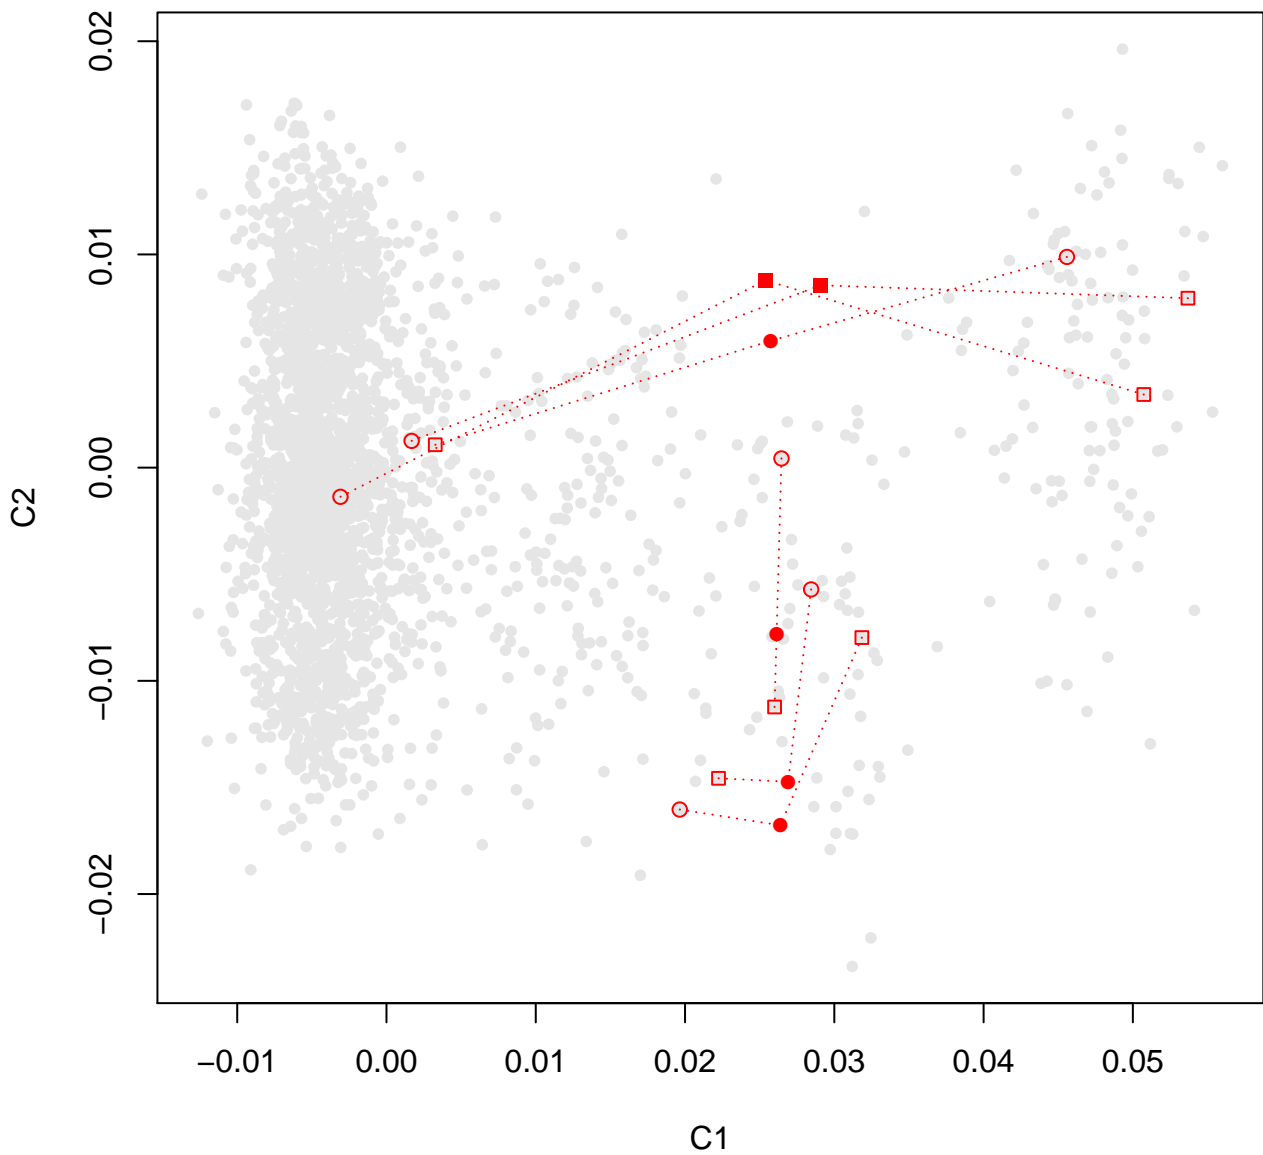

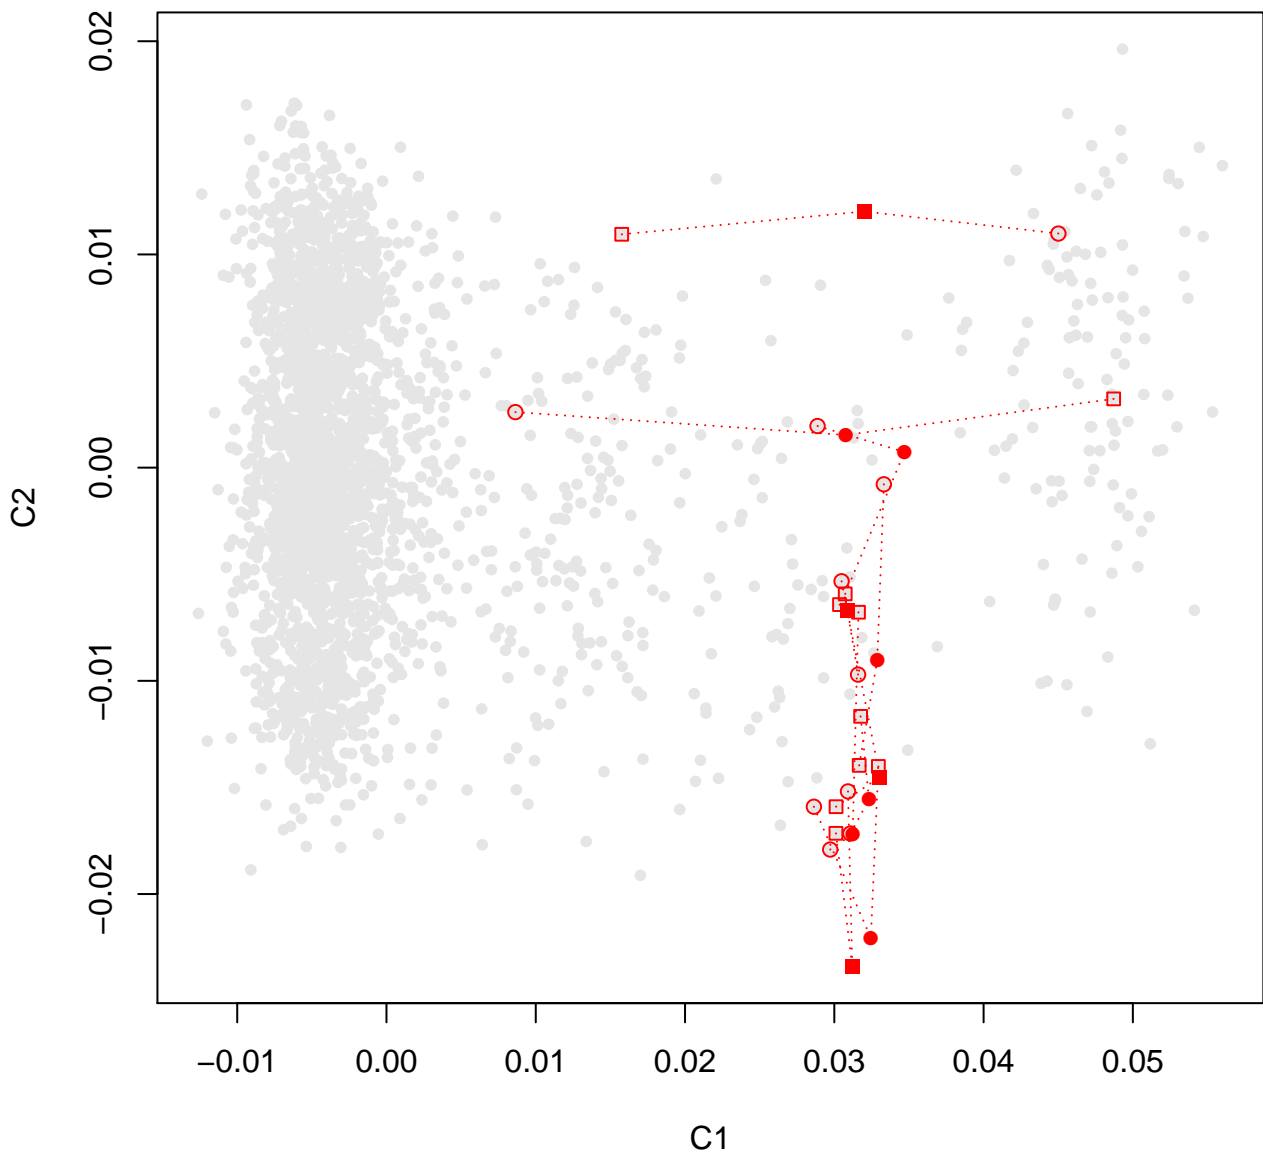

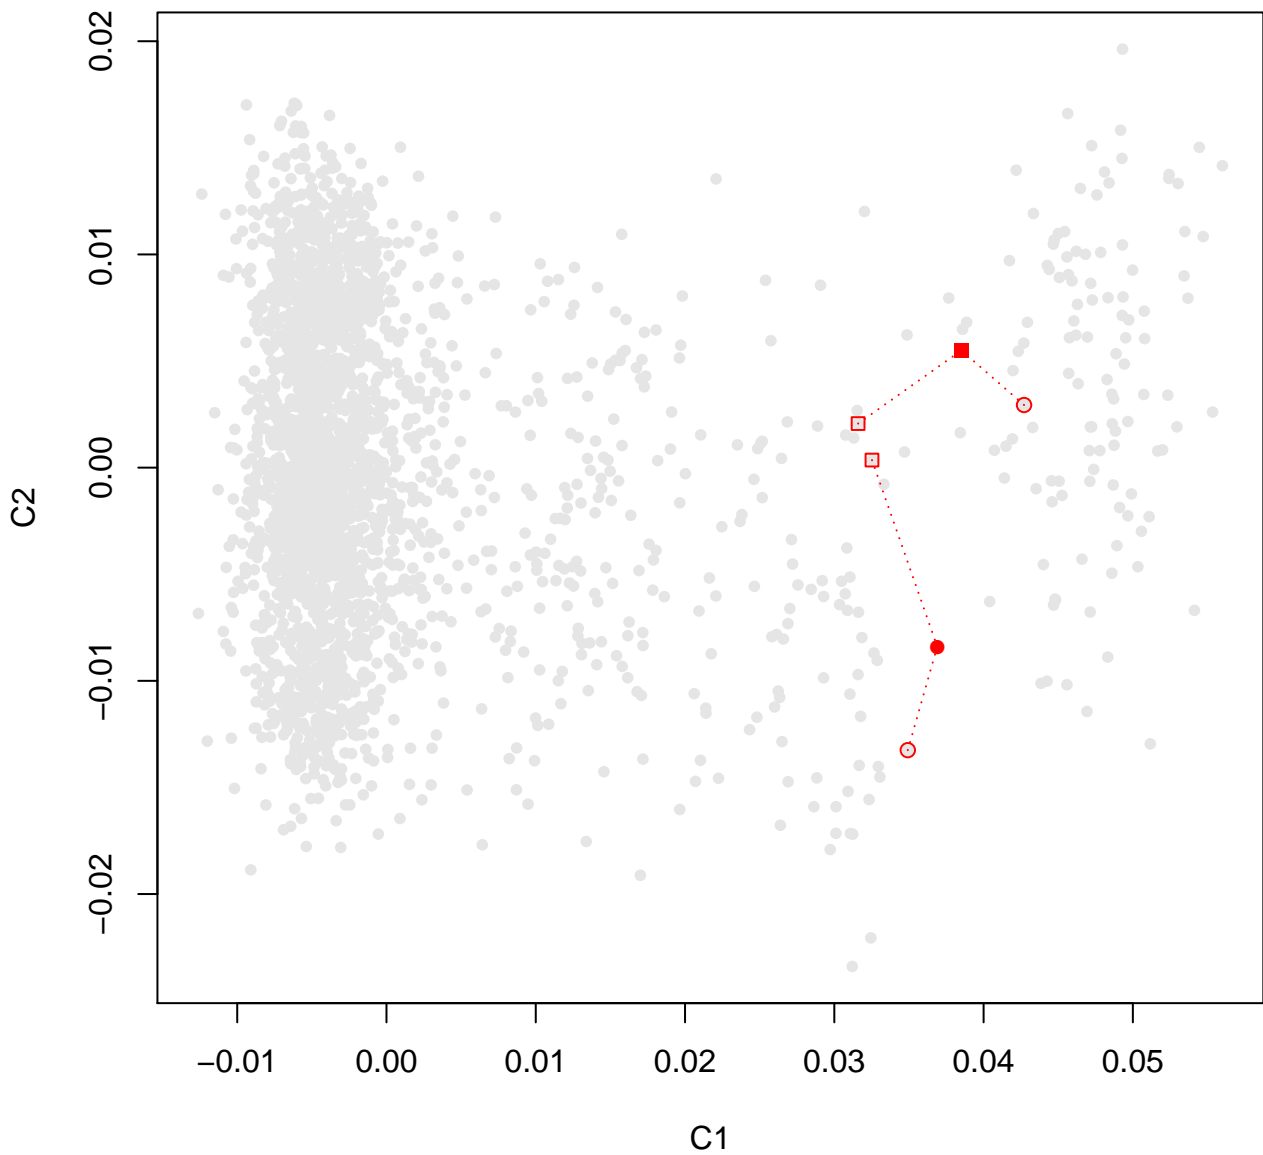

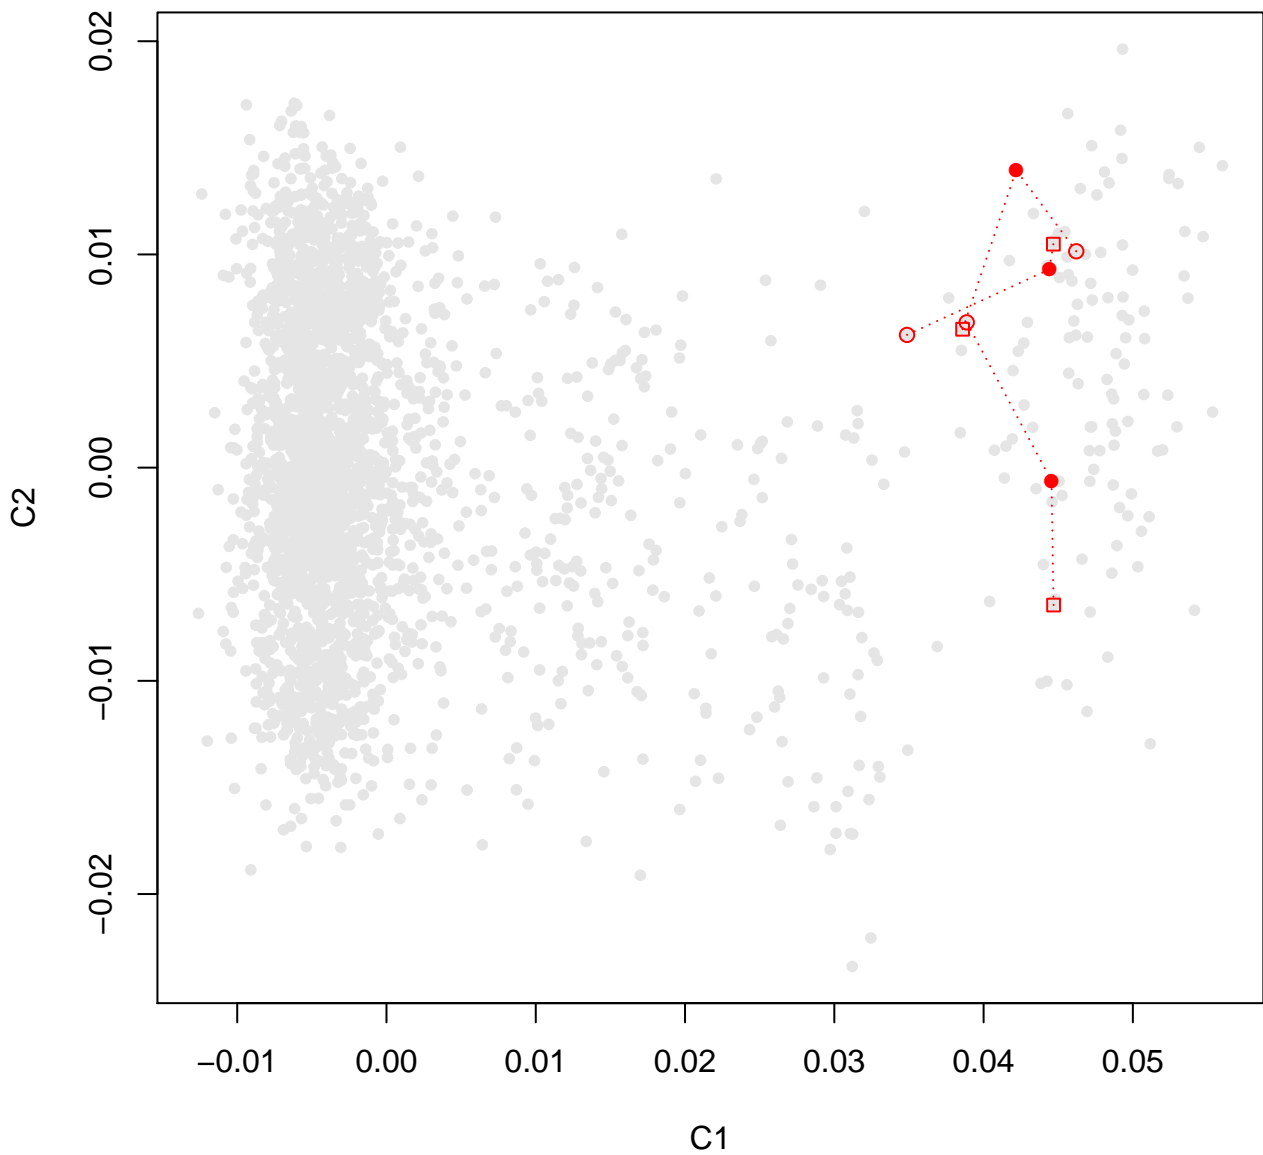



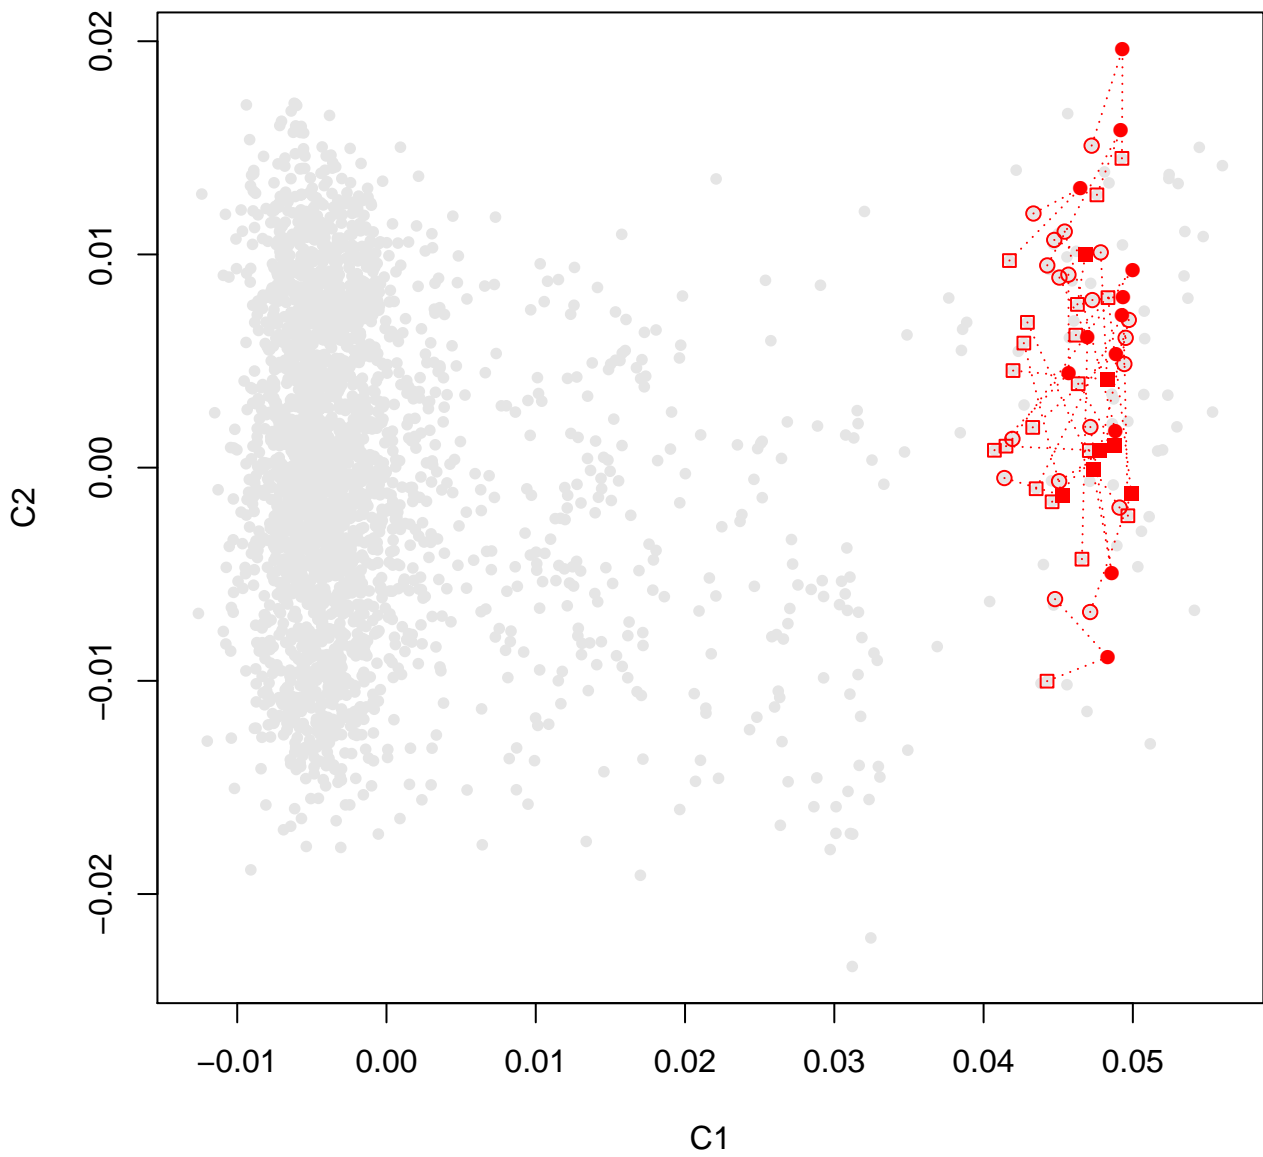

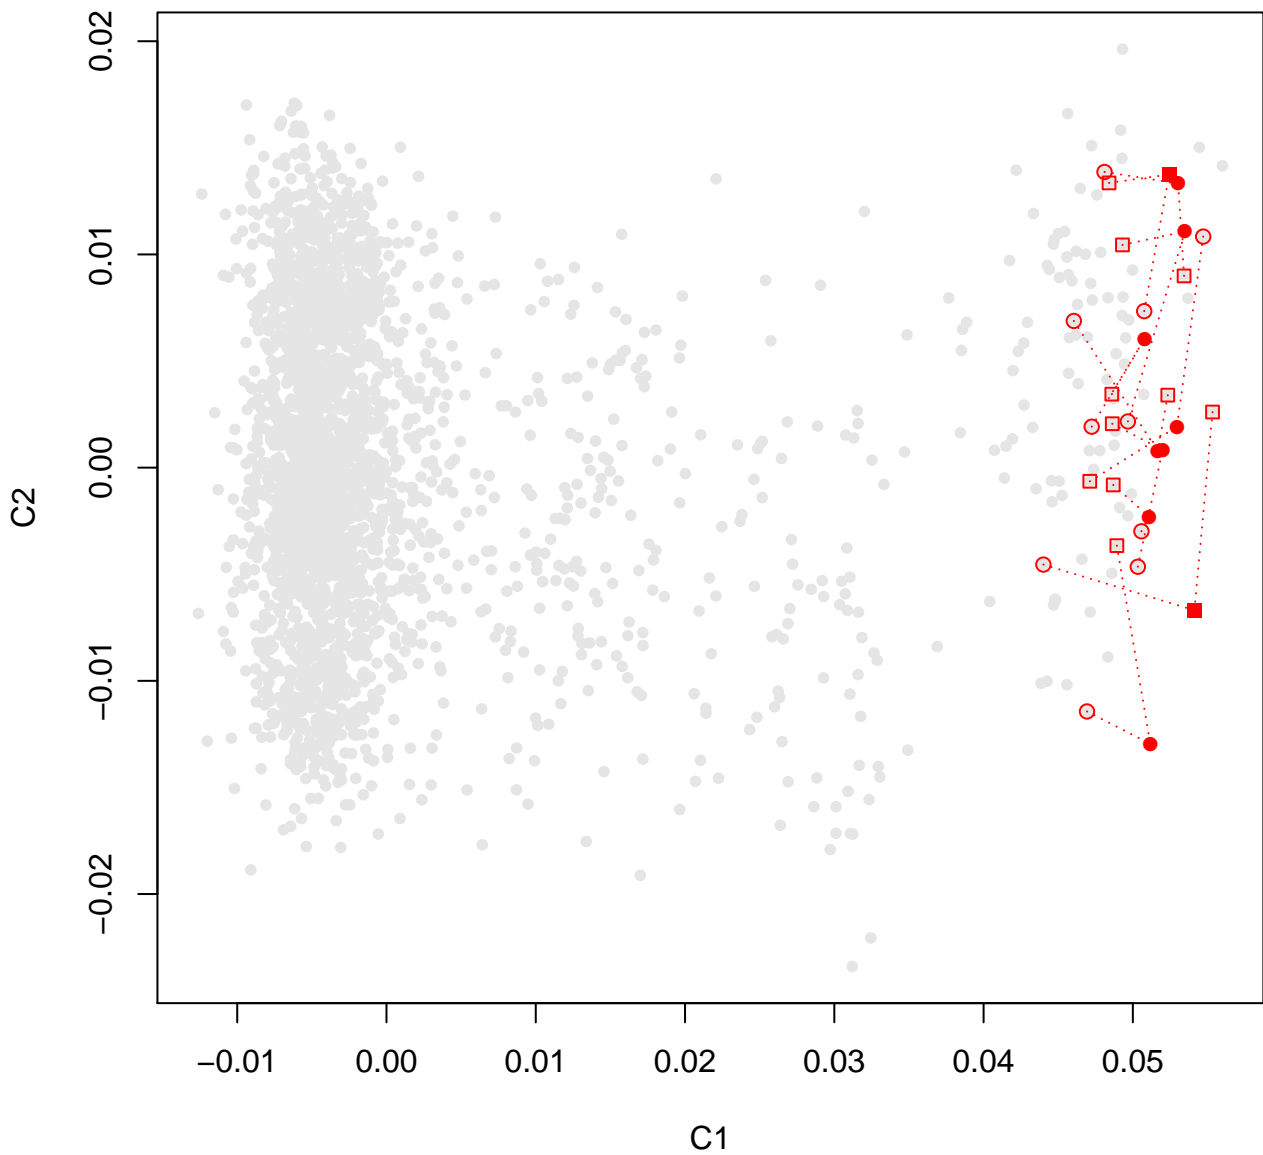

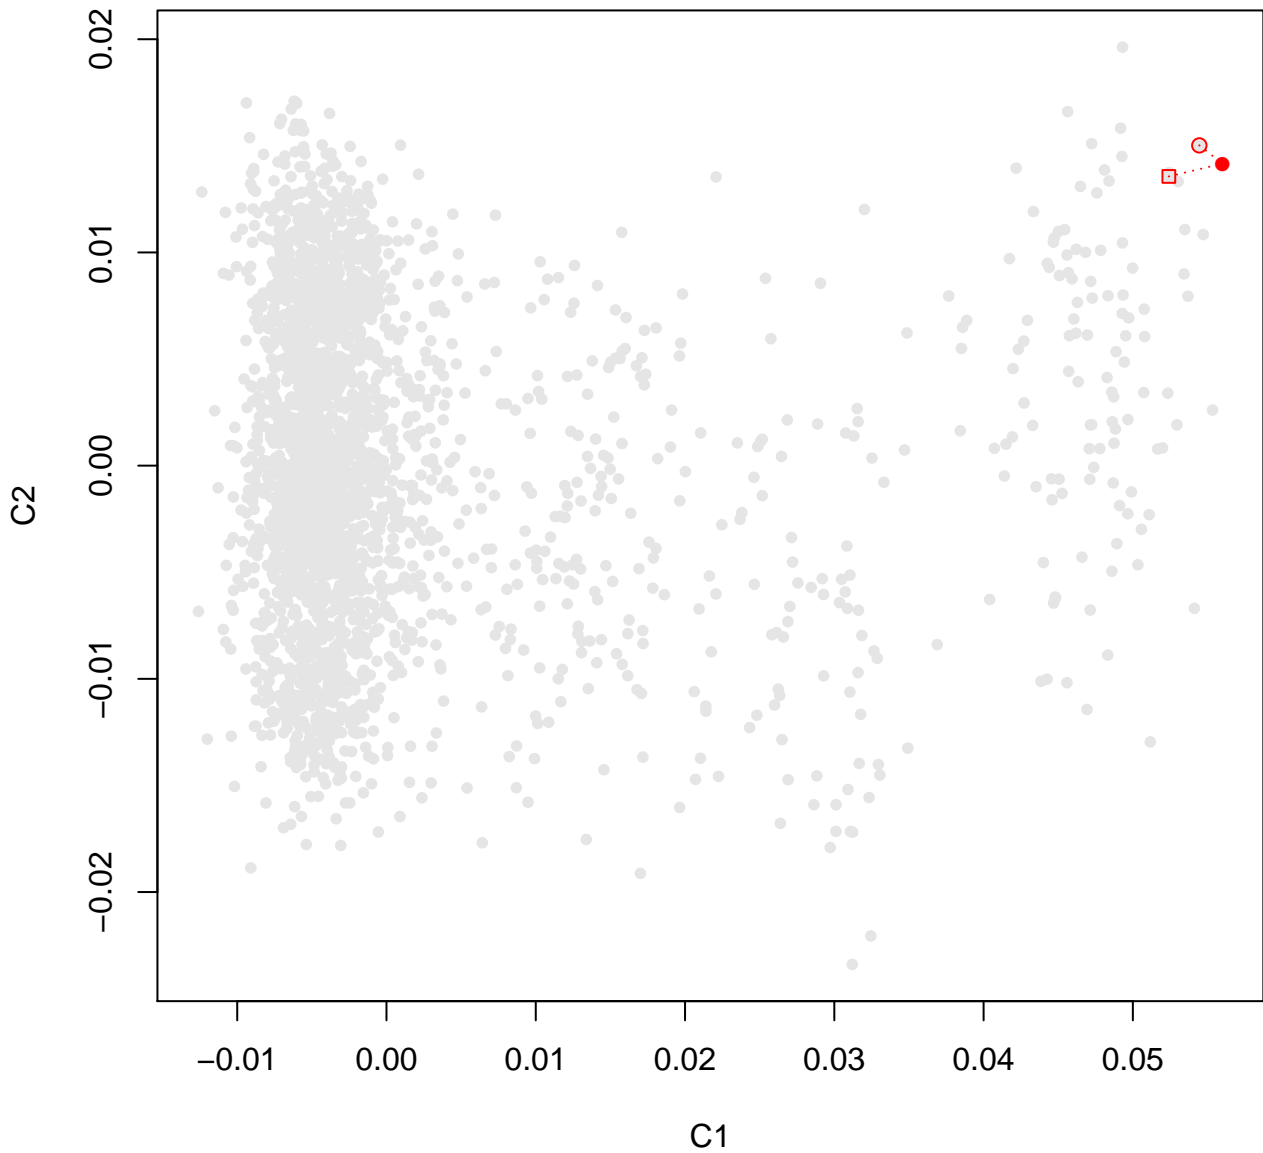

Supplement: 12881_2015_201_MOESM5_ESM.pdf [file 12881_2015_201_MOESM5_ESM.pdf]
